# Supplementary material
Source: publisher figshare collection journal article supplement (https://frontiersin.figshare.com/ndownloader/files/24573725)
Supplement: Supplementary file [file 24573725]

Supplemental table 1.

| Strain            | Origin     | Genetic group |
|-------------------|------------|---------------|
| AWRI1499          | wine       | AWRI1499      |
| ISA2404           | wine       |               |
| L1792             | Kombucha   |               |
| L1793             | Kombucha   |               |
| L0417*            | wine       |               |
| L0424*            | wine       |               |
| L0516*            | wine       |               |
| L06/034AZ         | wine       |               |
| L14156*           | wine       |               |
| L14190*           | wine       |               |
| LB15109p*         | wine       |               |
| UWOPS94-239.3     | Tequila    | CBS2499       |
| VP1545            | wine       |               |
| 13EN11C5          | wine       |               |
| 11AVB4            | wine       |               |
| CBS 2499          | wine       |               |
| DEN612_9          | wine       |               |
| L02/E2 AZ         | wine       |               |
| L0469*            | wine       |               |
| L0611*            | wine       |               |
| L14160*           | wine       |               |
| L14163*           | wine       | AWRI1608      |
| L14168*           | wine       |               |
| L14186*           | cider      |               |
| CBS 6055          | beer       |               |
| L17105            | Kombucha   |               |
| AWRI1608          | wine       |               |
| AWRI1677          | wine       |               |
| CDR202            | wine       |               |
| GSP1504           | beer       |               |
| GSP1516           | beer       |               |
| GSP1518           | beer       |               |
| ISA1700           | wine       |               |
| L0422*            | wine       |               |
| L0463*            | wine       |               |
| L14173*           | wine       |               |
| L14183*           | wine       |               |
| L14195*           | beer       | L0308         |
| YJS5400           | wine       |               |
| L1120*            | white wine |               |
| L1710*            | wine       |               |
| L0308*            | wine       |               |
| L1757*            | unknown    |               |
| L1781*            | wine       |               |
| B001-14 T28 1 bis | wine       |               |
| L17103            | Kombucha   |               |
| L17104            | Kombucha   |               |
| CBS3025 bis       | beer       | CBS5512       |
| UWOPS92-244.4     | Tequila    |               |
| UWOPS92-255.4     | Tequila    |               |
| UWOPS92-262.3     | Tequila    |               |
| JP258V2013.C7     | Bioethanol |               |
| JP354V2014.C8     | Bioethanol |               |
